# Supplementary material
Source: PubMed Central journal article supplement (PMC2448843)
Supplement: 0803080105_Supplemental_PDF.pdf [file 0803080105_Supplemental_PDF.pdf]

# Supporting Information

Ornish *et al.* 10.1073/pnas.0803080105

[Dataset S1](#)

[Dataset S2](#)

[Dataset S3](#)

[Dataset S4](#)
